# Supplementary material for: Advanced Ann Arbor stage and age over 60 years as prognostic predictors in patients with primary cervical lymphoma: a retrospective cohort study and systematic review
Source: Springer Nature journal article supplement (doi:10.1186/s12885-023-10548-4), 2023-01-27

Supplementary figure S1. The inclusion process summarized in the PRISMA flow diagram.

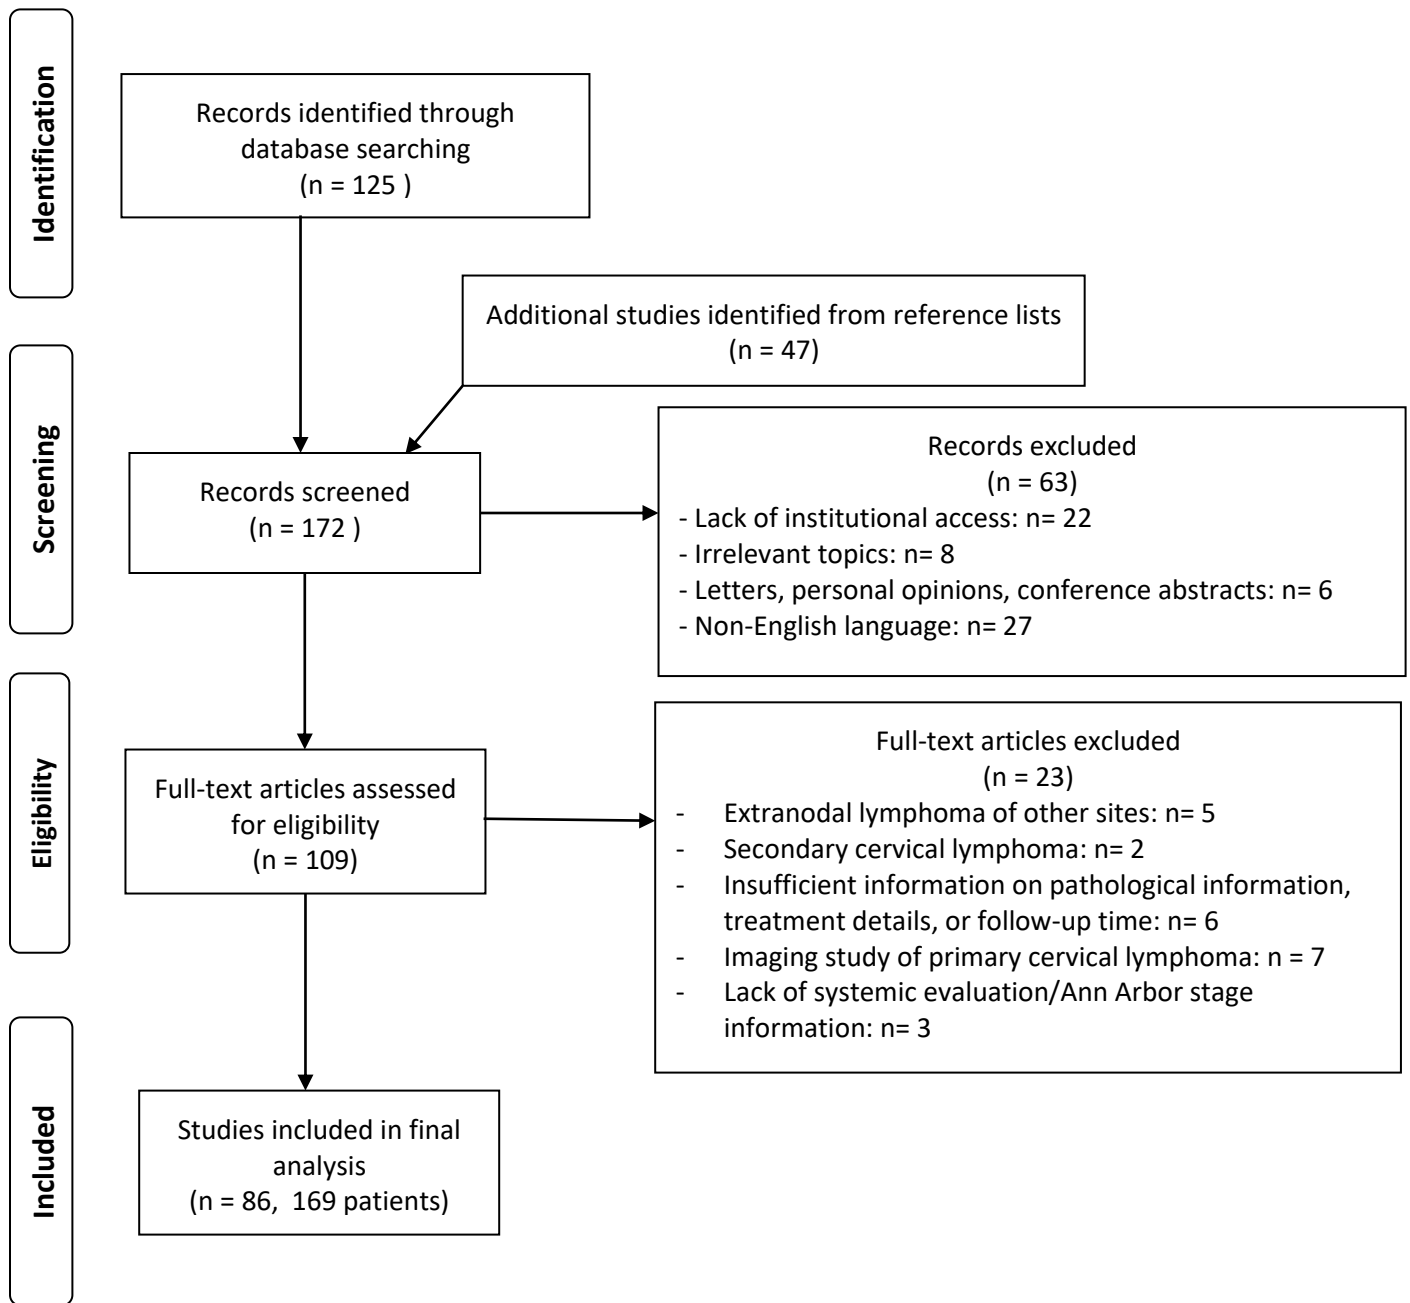

Supplement: MOESM1 [file 23961118]
